# Supplementary material
Source: PubMed Central journal article supplement (PMC8168936)

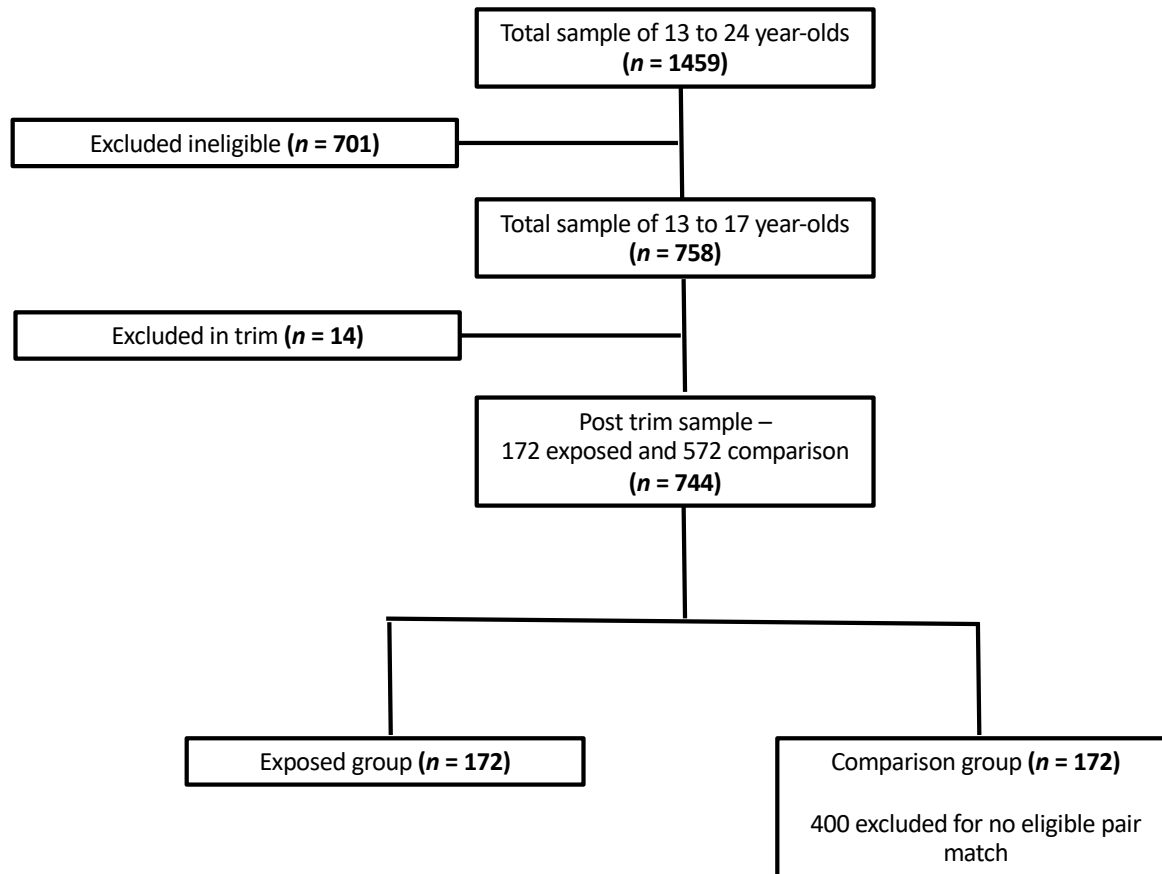

Supplement: NIHMS1701880-supplement-Supplementary_file_10.pdf [file NIHMS1701880-supplement-Supplementary_file_10.pdf]
